# Supplementary material for: Quantification of Dolichyl Phosphates Using Phosphate Methylation and Reverse-Phase Liquid Chromatography–High Resolution Mass Spectrometry
Source: PubMed Central journal article supplement — Anal Chem. 2023 Jan 30;95(6):3210–7. doi: 10.1021/acs.analchem.2c03623 (PMC9933046; doi:10.1021/acs.analchem.2c03623), 2023-01-30
Supplement: ac2c03623_si_001.pdf [file ac2c03623_si_001.pdf]

## Supporting information for

### **Quantification of dolichyl phosphates using phosphate methylation and reverse-phase liquid chromatography-high resolution mass spectrometry**

Dipali Kale <sup>1#</sup>, Frauke Kikul <sup>1</sup>, Prasad Phapale <sup>2</sup>, Lars Beedgen <sup>3</sup>, Christian Thiel <sup>3</sup>, and Britta Brügger <sup>1\*</sup>

<sup>1</sup>Heidelberg University Biochemistry Center (BZH), 69120 Heidelberg, Germany

<sup>2</sup>Leibniz-Institut für Analytische Wissenschaften-ISAS-e.V., 44139 Dortmund, Germany

<sup>3</sup>Centre for Child and Adolescent Medicine, University Hospital Heidelberg, 69120 Heidelberg, Germany

#Current address: Leibniz-Institut für Analytische Wissenschaften-ISAS-e.V., 44139 Dortmund, Germany

\*Authors to whom correspondence should be send:

[britta.bruegger@bzh.uni-heidelberg.de](mailto:britta.bruegger@bzh.uni-heidelberg.de), [dipali.kale@isas.de](mailto:dipali.kale@isas.de)

## Table of contents

Additional experimental information and results on validating the novel approach for MS-based DoIP analysis.

|           |                                                                                                                                                                                                                                     |
|-----------|-------------------------------------------------------------------------------------------------------------------------------------------------------------------------------------------------------------------------------------|
| Figure S1 | DoIP synthesis in mammals.                                                                                                                                                                                                          |
| Figure S2 | nESI-DIMS analysis of (A) un-methylated and (B) methylated DoIP standard.                                                                                                                                                           |
| Figure S3 | nESI-DIMS analysis of methylated PoIP C60 standard.                                                                                                                                                                                 |
| Figure S4 | RPLC-MS characteristics of di-methylated PoIP C60 standard.                                                                                                                                                                         |
| Figure S5 | EICs of $[M+NH_4]^+$ ions of the major DoIP species in the DoIP standard before and after methylation.                                                                                                                              |
| Figure S6 | Linearity curves for the RPLC-MS analysis of DoIP C70-105 species (on column) in the DoIP standard.                                                                                                                                 |
| Figure S7 | RPLC-MS characteristics of endogenous di-methylated DoIP C95 from HeLa cells.                                                                                                                                                       |
| Figure S8 | EICs of DoIP species from extracts of (A) HeLa cells and (B) <i>S. cerevisiae</i> after methylation, analysed by RPLC-MS.                                                                                                           |
| Table S1  | DoIP and PoIP molecular compositions and positive ion mode RPLC-MS characteristics of annotated di-methylated analyte species.                                                                                                      |
| Table S2  | Theoretical m/z list of un-methylated (+0 Me), mono-methylated (+1 Me), di-methylated (+2 Me) ions of C80-C95 species in DoIP standard.                                                                                             |
| Table S3  | Relative methylation efficiency (in %) of C80-C95 species in DoIP standard in nESI-DIMS analyses.                                                                                                                                   |
| Table S4  | Relative distribution (in %) of C80-C95 species in DoIP standard with and without RPLC separation and/or methylation, followed by MS detection.                                                                                     |
| Table S5  | Relative composition (in %) of C70-C105 species in methylated DoIP standard, calibration curve parameters, instrumental limit of detection (LOD) of the RPLC-MS method for the simultaneous determination of targeted DoIP species. |
| Table S6  | Results from intra- and inter-day accuracy and precision of RPLC-MS analysis of DoIP standard in HeLa cells extracts.                                                                                                               |
| Table S7  | Results from determination of extraction recovery (n=3) in blank solvent and post-preparation stability of RPLC-MS analysis of DoIP standard in HeLa cells extracts in autosampler for 20h (n=3).                                   |

## **Experimental Section**

### **Reagents and chemicals**

Potassium hydroxide (KOH), dichloromethane, and TMSD (#362832, 2 M in hexane) were obtained from Sigma-Aldrich. LC-MS grade water, isopropanol, methanol (MeOH), acetonitrile, ammonium acetate, and formic acid were from Fisher Scientific.

### **Cell culture**

For *S. cerevisiae* (strain W303-1B, derived from strain W303 [42]) sample preparations, approximately  $5 \times 10^7$  cells were cultured in YPD medium and harvested from cultures grown to mid-log phase with an OD600 value of 0.8. Fibroblasts from human patients were obtained with the patients' parents written informed consent. This study was performed in accordance with the Declaration of Helsinki and approved by the Ethics Committee of the Medical Faculty Heidelberg (S-904/2019). The cells were maintained at 37 °C in a humidified atmosphere under 5% CO<sub>2</sub>. Patient and control fibroblasts were cultured in Dulbecco's modified Eagle's medium (high glucose; Life Technologies) supplemented with 10% FCS (PAN Biotech, Aidenbach, Germany), 100 U/mL penicillin, and 100 µg/mL streptomycin. HeLa or fibroblast cell monolayers with 80 to 90% confluence in a T75 flask were washed twice with PBS and harvested using 2 mL 0.25% (v/v) trypsin-EDTA solution. All cell pellets were shock-frozen in liquid nitrogen and stored at -80 °C until lipid extractions were performed.

### **Safety considerations for handling TMSD**

TMSD must be handled with care, as its inhalation may cause lung damage or central nervous system depression. It was used with the appropriate safety procedures and personal safety protective equipment inside the fume hood. Excess TMSD in the hood atmosphere was neutralized with acetic acid.

## Method validation

The methylated DoIP standard was reconstituted in methanol, and a dilution series was prepared from 0.05 to 800 pg/ $\mu$ L. For each DoIP species, the linearity was assessed by plotting the analyte-to-internal standard peak area against the nominal concentration of individual species calculated based on their mol% distribution in the DoIP standard (Table S5, Fig. S6). Calibration curves (n=3) consisting of four to seven calibrator levels were constructed by simple linear regression analysis. For each DoIP species, the lower limit of detection (LOD) was chosen as the calibration concentration when a signal-to-noise ratio is at least 5:1.

Validation of the method was assessed at three-level quality control (QC), at low (50), medium (200), and high (500) pg/ $\mu$ L of methylated DoIP standard mixture. The intra- and inter-day assays were determined by analyzing the prepared samples on the same day and on three consecutive days. For precision and accuracy evaluations, samples were prepared by spiking the QC levels to the methylated HeLa cells extracts (n=3). Accuracy is assessed as an agreement between the back-calculated concentration of individual analyte species in the spiked samples and their nominal concentrations, whereas precision is expressed as the coefficient of variation (%CV) for both intra-day and inter-day analysis values are shown in Table S6. For DoIP species extraction recovery (Table S7), samples were prepared as pre-spikes and post-spikes at high and low QC levels in a pure solvent. The samples were extracted as described in the main text experimental section. The post-preparative stability (Table S7) was determined at low and high QC levels. These QC levels were spiked to methylated HeLa cell extracts, kept at 4 °C for 20 h in an autosampler. The results were compared to conditions using freshly prepared samples with the same nominal concentration.

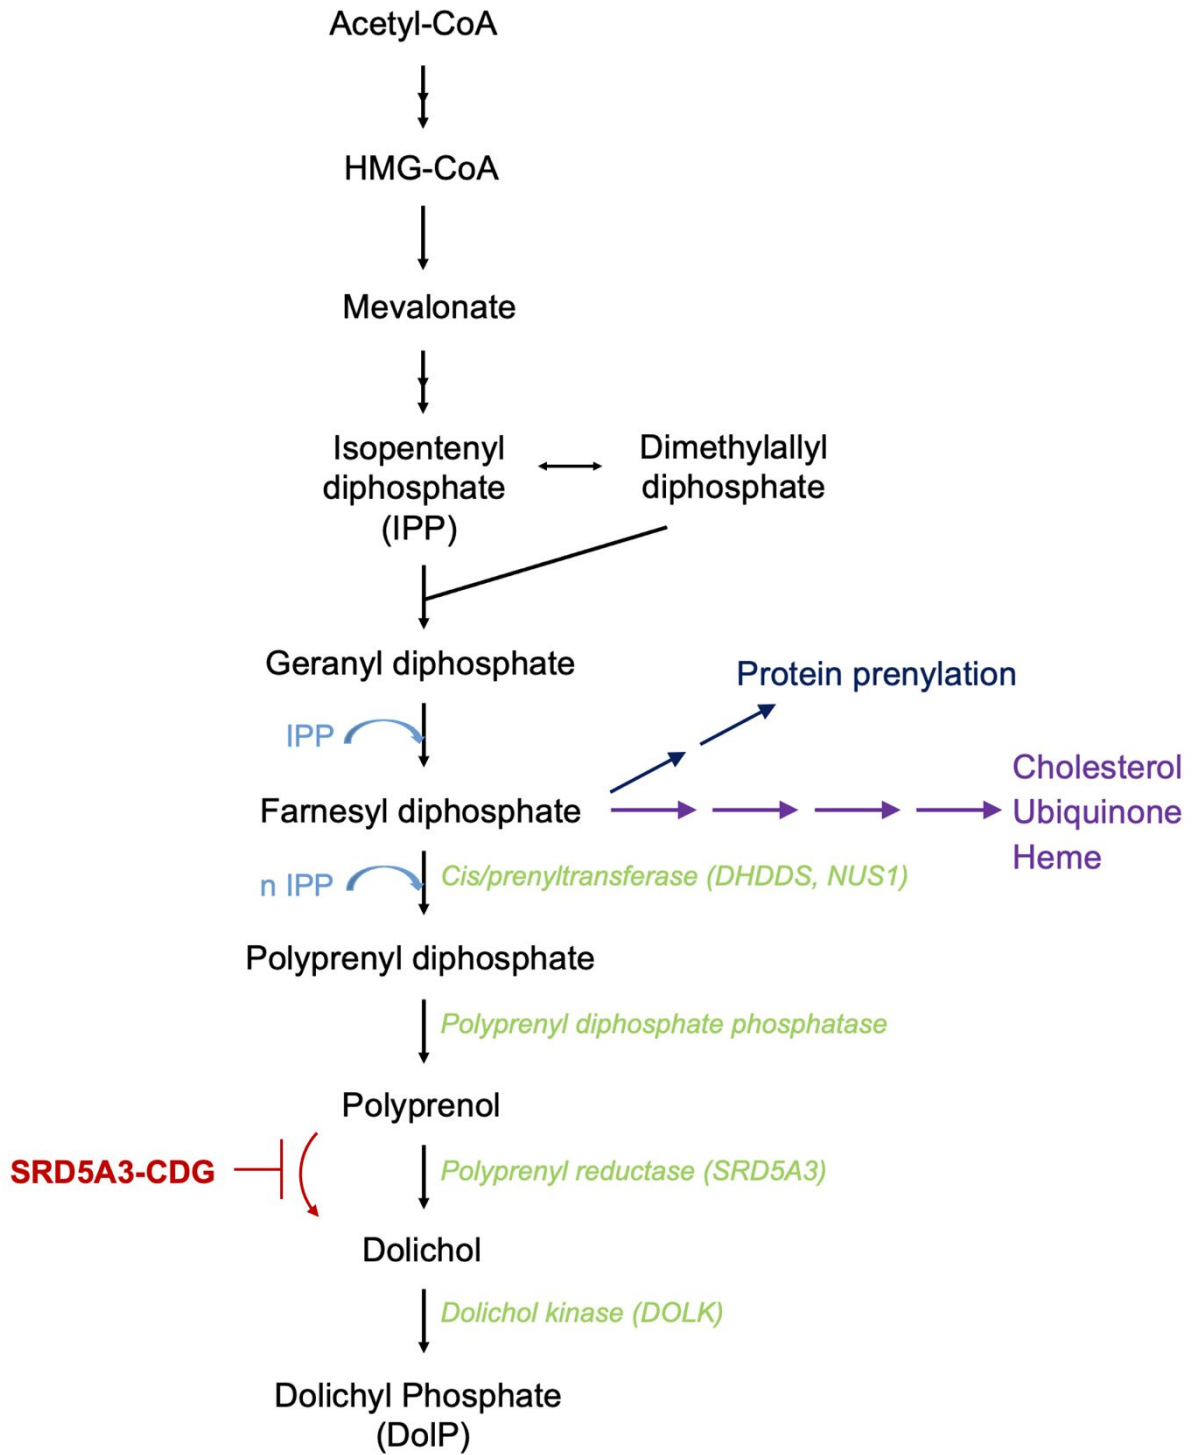

**Figure S1.** DoIP synthesis in mammals.

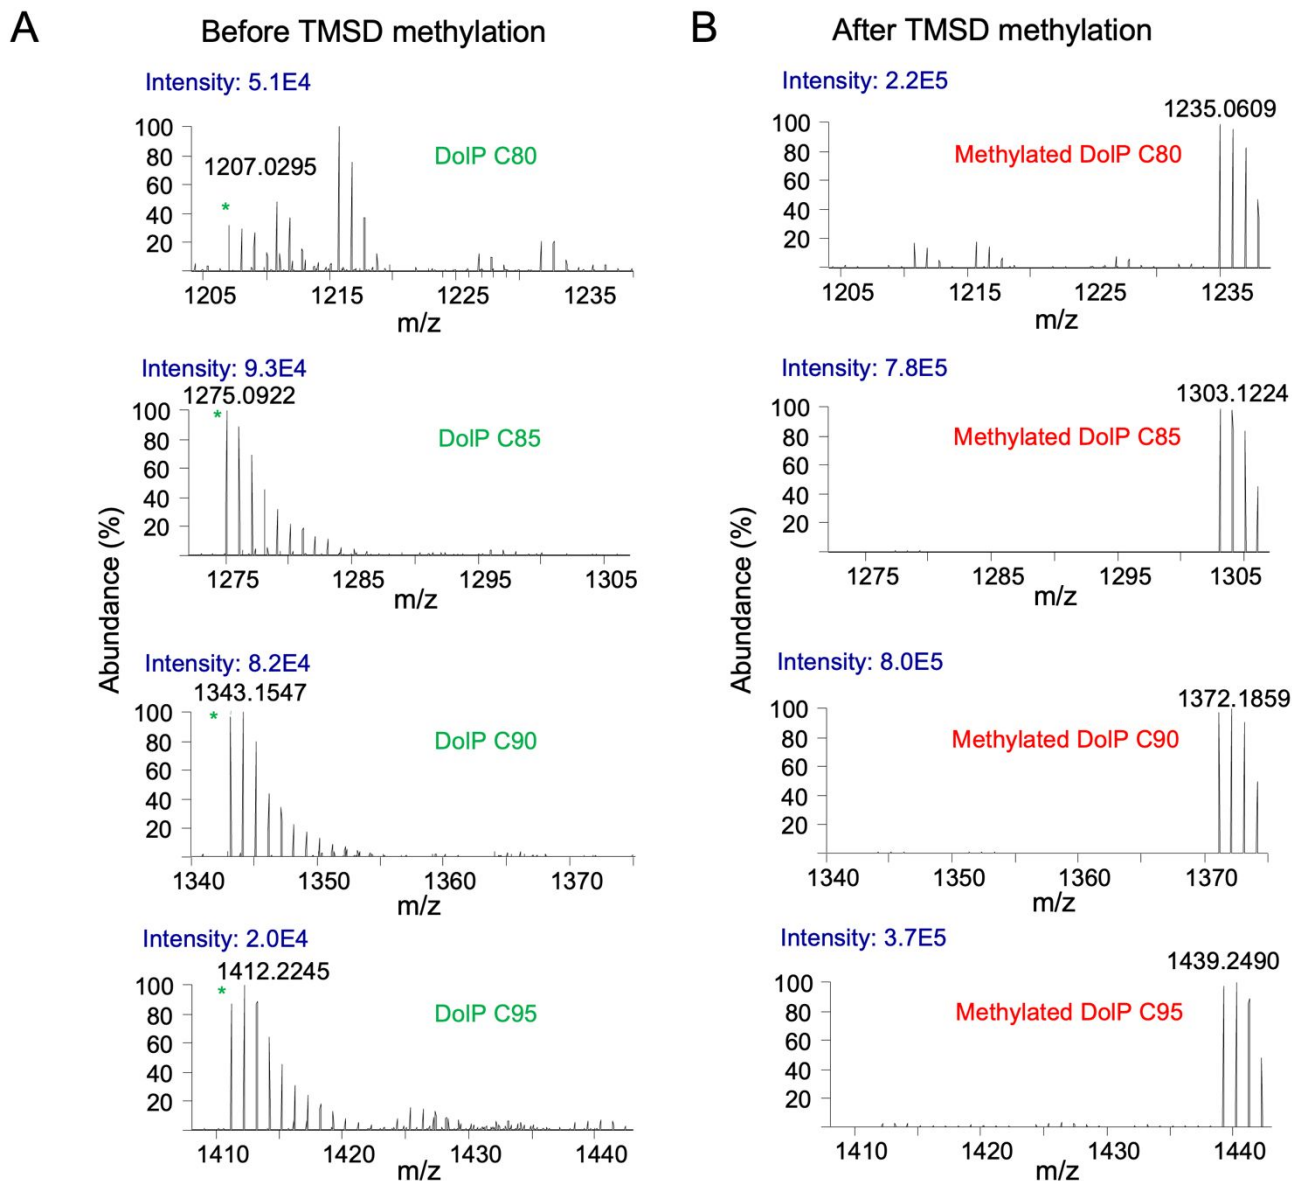

**Figure S2.** nESI-DIMS analysis of (A) un-methylated and (B) methylated DoIP standard. For theoretical m/z values of ammonium adducts of these un-, mono-, di-methylated DoIP ions please see Table S2.

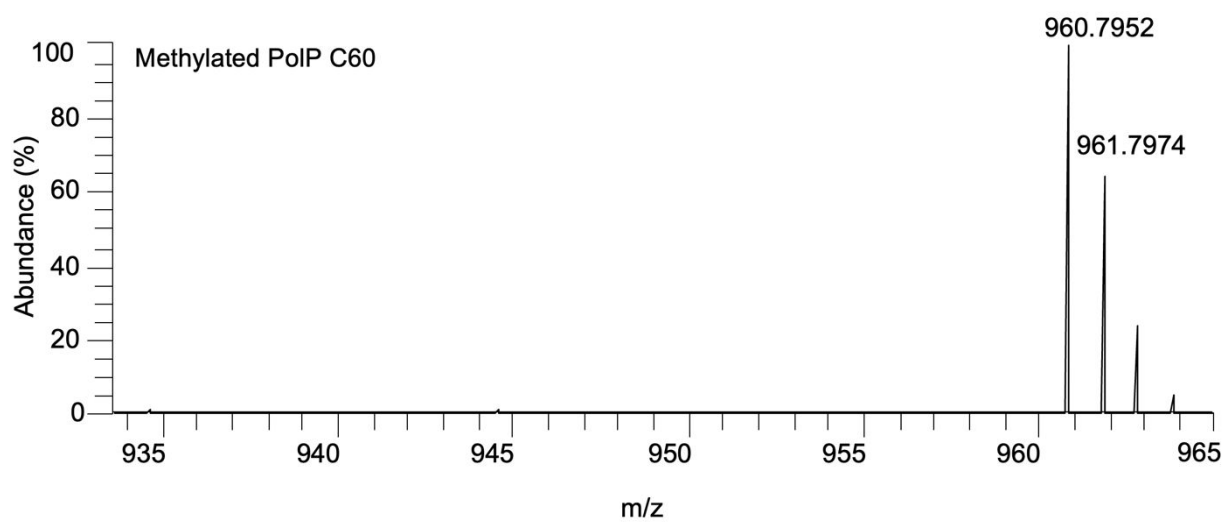

**Figure S3.** nESI-DIMS analysis of the ammonium adduct of methylated PoIP C60 standard.

**A**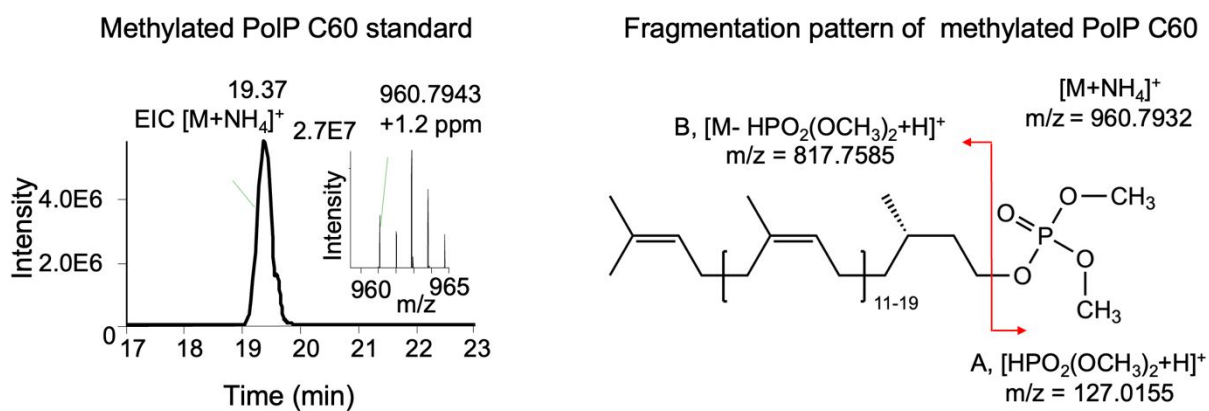**B**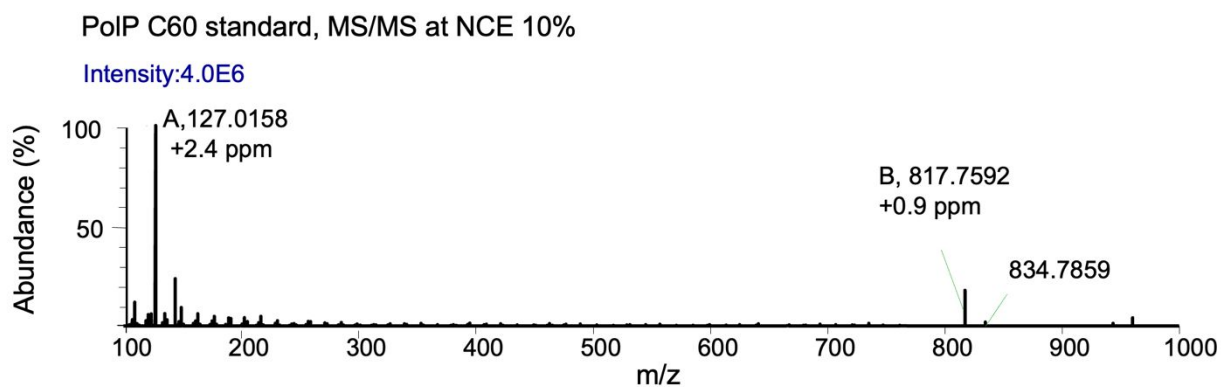

**Figure S4.** RPLC-MS characteristics of di-methylated PoIP C60 standard. **A**, EIC ( $\pm 5$  ppm) of the  $[M+NH_4]^+$  ion, with corresponding MS spectrum and theoretical fragmentation pattern. **B**, MS/MS spectrum resulting from low collision-induced dissociation (NCE 10%), showing the di-methylated phosphate head group fragment ion. In B, the letters A and B refer to the illustration of the fragmentation pattern shown in (A).



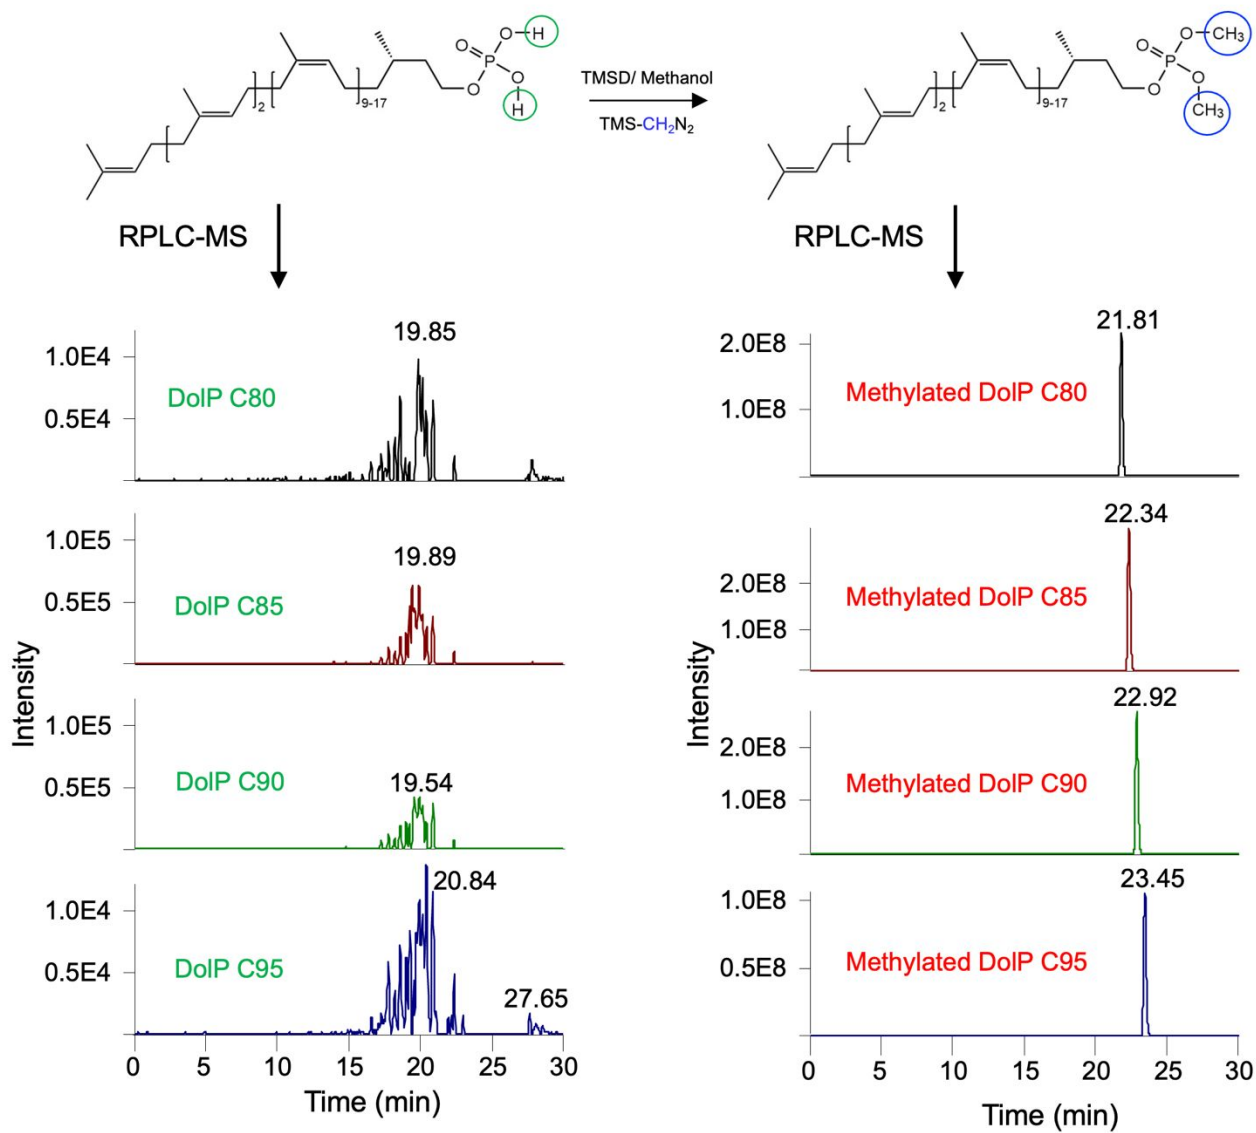

**Figure S5.** EICs of  $[\text{M}+\text{NH}_4]^+$  ions of the major DoIP species in the DoIP standard mixture before and after methylation.

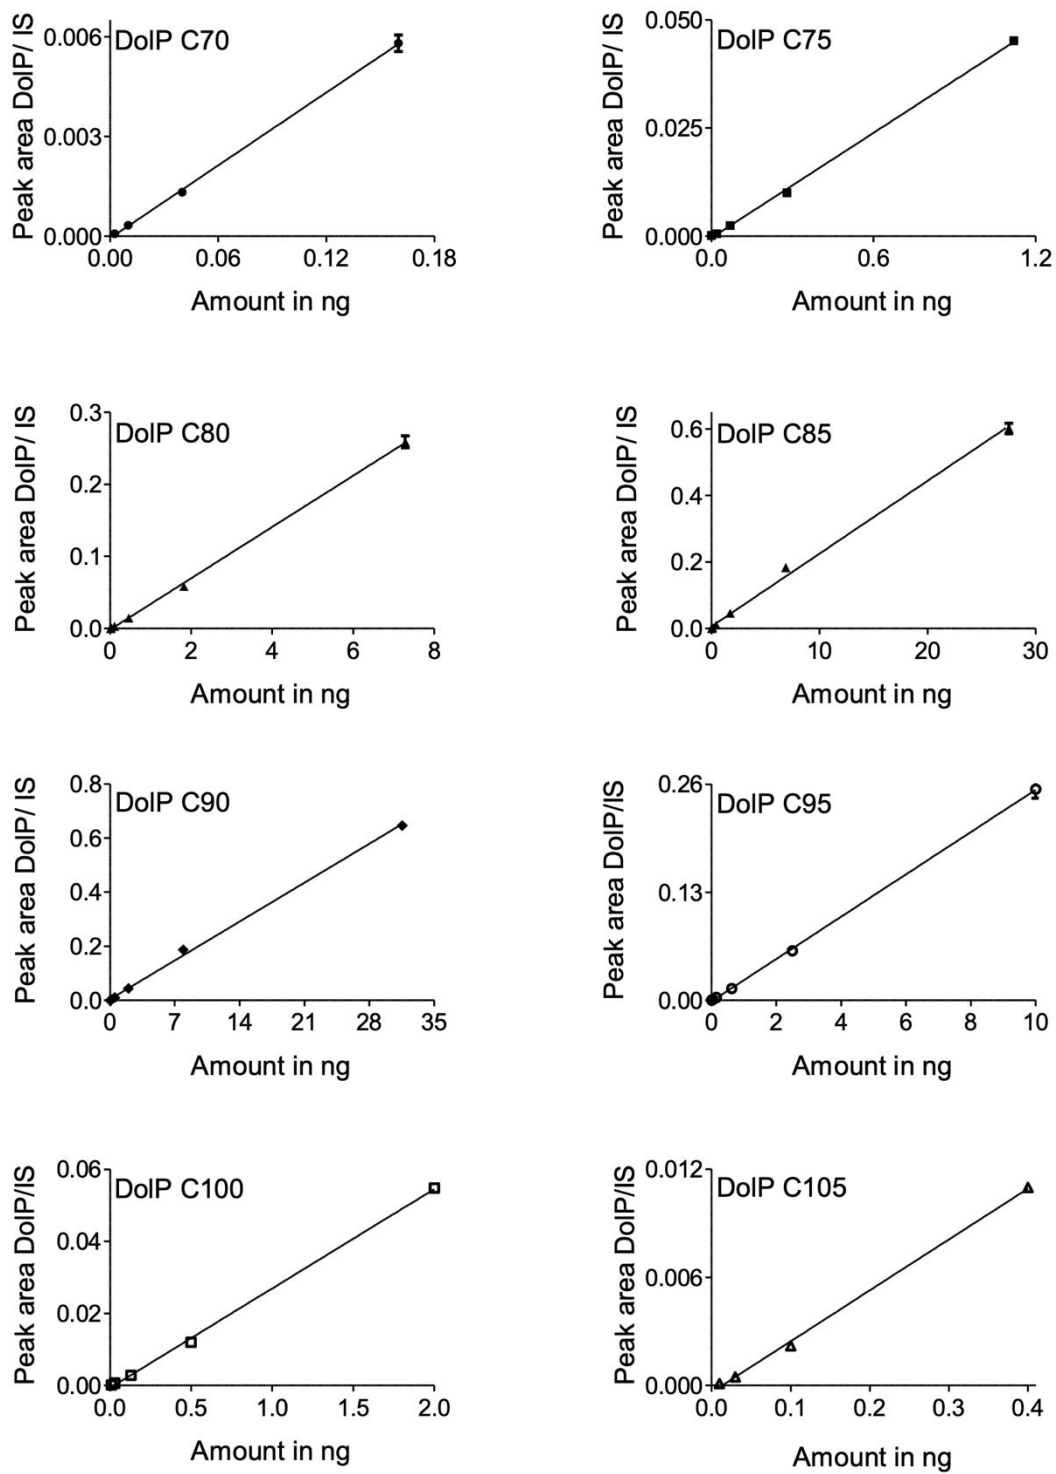

**Figure S6.** Linearity curves for the RPLC-MS analysis of C70-105 species (on column) in DolP standard mixture.

**A**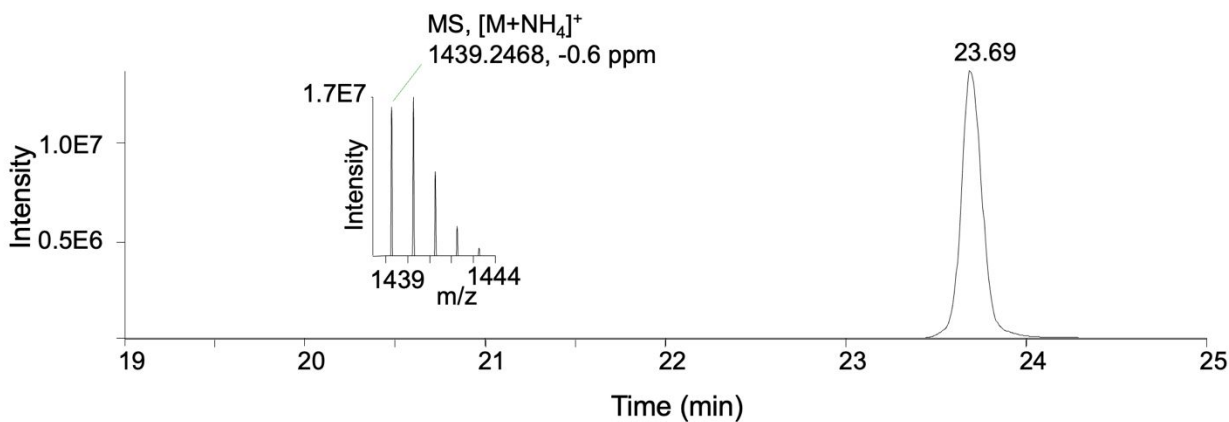**B**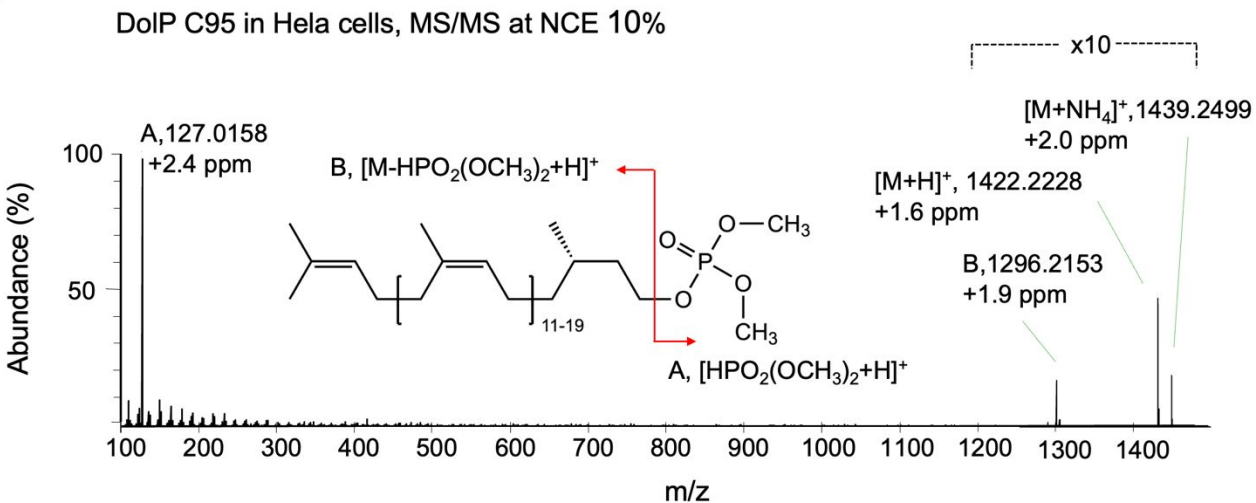

**Figure S7.** RPLC-MS characteristics of endogenous di-methylated DoIP C95 from HeLa cells. **A**, EICs ( $\pm 5$  ppm) of the  $[M+NH_4]^+$  ions, with corresponding MS spectrum. **B**, MS/MS spectrum resulting from low collision-induced dissociation (NCE 10%), with fragmentation pattern showing the di-methylated phosphate head group ion and other product ions.

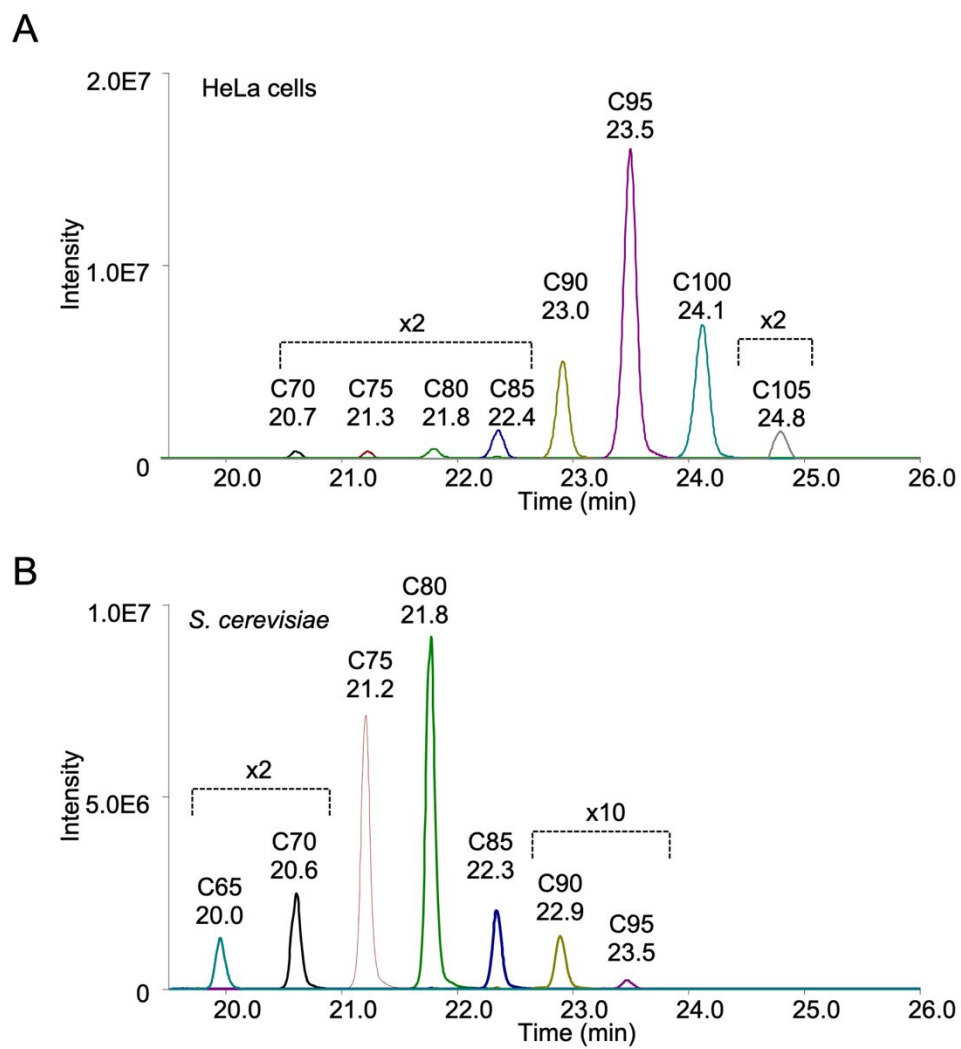

**Figure S8.** EICs of DoIP species from extracts of (A) HeLa cells and (B) *S. cerevisiae* after methylation, analysed by RPLC-MS.

**Table S1.** DoIP and PoIP molecular compositions and positive ion mode RPLC-MS characteristics of annotated di-methylated analyte species (as  $[M+NH_4]^+$  ions) in this study.

| Analyte species | Isoprene units (n) | Molecular formula                                  | Theoretical m/z | Observed m/z | Mass error (ppm) | RT (min) | RRT <sup>a</sup> |
|-----------------|--------------------|----------------------------------------------------|-----------------|--------------|------------------|----------|------------------|
| PoIP C60        | 12                 | C <sub>62</sub> H <sub>103</sub> O <sub>4</sub> P  | 960.7932        | 960.7924     | -0.8             | 19.1     | 1.00             |
| DoIP C65        | 13                 | C <sub>67</sub> H <sub>113</sub> O <sub>4</sub> P  | 1030.8715       | 1030.8711    | -0.4             | 20.0     | 1.05             |
| DoIP C70        | 14                 | C <sub>72</sub> H <sub>121</sub> O <sub>4</sub> P  | 1098.9341       | 1098.9360    | 1.7              | 20.6     | 1.08             |
| DoIP C75        | 15                 | C <sub>77</sub> H <sub>129</sub> O <sub>4</sub> P  | 1166.9967       | 1166.9976    | 0.8              | 21.2     | 1.11             |
| DoIP C80        | 16                 | C <sub>82</sub> H <sub>137</sub> O <sub>4</sub> P  | 1235.0593       | 1235.0613    | 1.6              | 21.8     | 1.14             |
| DoIP C85        | 17                 | C <sub>87</sub> H <sub>145</sub> O <sub>4</sub> P  | 1303.1219       | 1303.1229    | 0.8              | 22.3     | 1.17             |
| DoIP C90        | 18                 | C <sub>92</sub> H <sub>153</sub> O <sub>4</sub> P  | 1371.1845       | 1371.1854    | 0.7              | 22.9     | 1.20             |
| DoIP C95        | 19                 | C <sub>97</sub> H <sub>161</sub> O <sub>4</sub> P  | 1439.2471       | 1439.2476    | 0.3              | 23.5     | 1.23             |
| DoIP C100       | 20                 | C <sub>102</sub> H <sub>169</sub> O <sub>4</sub> P | 1507.3097       | 1507.3127    | 2.0              | 24.1     | 1.26             |
| DoIP C105       | 21                 | C <sub>107</sub> H <sub>177</sub> O <sub>4</sub> P | 1575.3720       | 1575.3724    | 0.3              | 24.7     | 1.29             |

<sup>a</sup> RRT, ratio of the retention of the peak relative to PoIP C60

**Table S2.** Theoretical m/z list of un-methylated (+0 Me), mono-methylated (+1 Me), di-methylated (+2 Me) [M+NH<sub>4</sub>]<sup>+</sup> ions of C80-C95 species in DoIP standard.

| DoIP species<br>chain length | m/z list of species in DoIP standard |                    |                    |
|------------------------------|--------------------------------------|--------------------|--------------------|
|                              | +0 <sup>a</sup> Me                   | +1 <sup>a</sup> Me | +2 <sup>a</sup> Me |
| C80                          | 1207.0280                            | 1221.0436          | 1235.0593          |
| C85                          | 1275.0906                            | 1289.1062          | 1303.1219          |
| C90                          | 1343.1532                            | 1357.1688          | 1371.1845          |
| C95                          | 1411.2158                            | 1425.2314          | 1439.2471          |

<sup>a</sup> Number of methylations in DoIP

**Table S3.** Relative methylation efficiency (in %) of C80-C95 species in DoIP standard in nESI-DIMS analyses.

| DoIP species<br>chain length | % <sup>a</sup> of methylated compounds <sup>c</sup> |                    |
|------------------------------|-----------------------------------------------------|--------------------|
|                              | +0 <sup>b</sup> Me                                  | +2 <sup>b</sup> Me |
| C80                          | 0 ± 0.34                                            | 100 ± 0            |
| C85                          | 0.82 ± 0.46                                         | 99.02 ± 0.16       |
| C90                          | 0.33 ± 0.57                                         | 99.06 ± 0.2        |
| C95                          | 0 ± 0                                               | 100 ± 0            |

<sup>a</sup>

$$\% \text{ of methylation efficiency} = \left( 1 - \frac{\text{Intensity of intact DoIP species after methylation}}{\text{Intensity of intact DoIP species before methylation}} \right) * 100\%$$

<sup>b</sup> Number of methylations in DoIP

<sup>c</sup> Values are mean ± SD, (n = 3)

**Table S4.** Relative distribution (in %) of C80-C95 species in DoIP standard with and without RPLC separation and/or methylation, followed by MS detection.

| DoIP species<br>chain length | % <sup>a</sup> Distribution of species in DoIP standard |            |                      |
|------------------------------|---------------------------------------------------------|------------|----------------------|
|                              | without methylation                                     |            | with methylation     |
|                              | nESI-DIMS                                               | nESI-DIMS  | <sup>b</sup> RPLC-MS |
| C80                          | 11.1 ± 0.2                                              | 11.0 ± 0.3 | 10.4 ± 0.3           |
| C85                          | 38.4 ± 0.3                                              | 36.8 ± 0.5 | 37.1 ± 1.5           |
| C90                          | 38.3 ± 0.1                                              | 39.3 ± 0.3 | 40.4 ± 1.1           |
| C95                          | 12.2 ± 0.3                                              | 12.9 ± 0.5 | 12.2 ± 0.3           |

<sup>a</sup> Values represent peak areas of species, normalized to total peak area and are expressed as mean ± SD of n=3 independent measurements.

<sup>b</sup> For detailed distribution of methylated species following RPLC-MS analysis refer to Table S4.

**Table S5.** Relative composition (in %) of C70-C105 species in methylated DoIP standard, calibration curve parameters, instrumental limit of detection (LOD) of the RPLC-MS method for the simultaneous determination of targeted DoIP species.

| DoIP species chain length | % Distribution <sup>a</sup> in DoIP standard | Calibration range <sup>a</sup> (pg on column) | LOD <sup>a</sup> (pg on column) | r <sup>2</sup> | Calibration Curve equation |
|---------------------------|----------------------------------------------|-----------------------------------------------|---------------------------------|----------------|----------------------------|
| C70                       | 0.2 ± 0 <sup>b</sup>                         | 3 - 160                                       | 1                               | 0.99           | y = 0.036x - 0.0001        |
| C75                       | 1.4 ± 0.1 <sup>b</sup>                       | 4 - 1120                                      | 1                               | 1.00           | y = 0.041x - 0.0004        |
| C80                       | 9.1 ± 0.3                                    | 7 - 7280                                      | 2                               | 1.00           | y = 0.036x - 0.0016        |
| C85                       | 34.4 ± 1.4                                   | 7 - 27520                                     | 2                               | 1.00           | y = 0.022x + 0.0060        |
| C90                       | 39.4 ± 1.0                                   | 8 - 31520                                     | 2                               | 1.00           | y = 0.021x + 0.0042        |
| C95                       | 12.5 ± 0.3                                   | 10 - 10000                                    | 2                               | 1.00           | y = 0.025x - 0.0012        |
| C100                      | 2.5 ± 0.0 <sup>b</sup>                       | 8 - 2000                                      | 2                               | 1.00           | y = 0.028x - 0.0006        |
| C105                      | 0.5 ± 0.1 <sup>b</sup>                       | 6 - 400                                       | 2                               | 1.00           | y = 0.028x - 0.0003        |

<sup>a</sup> Amount of different species in the DoIP standard, expressed as the ratio of the peak area of each DoIP species to the total area of all DoIP species, determined in three independent methylation experiments and represent mean ± SD.

<sup>b</sup> Additional DoIP species detected in RPLC-MS but not in nESI-DIMS analyses.



**Table S6.** Results from intra- and inter-day accuracy and precision of RPLC-MS analysis of DoIP standard in HeLa cells extracts.

| DoIP species chain length | QC level (pg/ $\mu$ L) | Accuracy (n=3)    |                   | Precision (n=3) |           | Observed nominal concentration (pmol/ $10^6$ cells) in Hela cells (n=3) |        |
|---------------------------|------------------------|-------------------|-------------------|-----------------|-----------|-------------------------------------------------------------------------|--------|
|                           |                        | Inter-day         | Intra-day         | Inter-day       | Intra-day | (Mean $\pm$ SD, %)                                                      | (CV,%) |
|                           |                        | (Mean $\pm$ SD,%) | (Mean $\pm$ SD,%) | (CV,%)          | (CV,%)    |                                                                         |        |
| C70                       | Low 50                 | 107.2 $\pm$ 4.6   | 104.5 $\pm$ 4     | 3.8             | 4.3       |                                                                         |        |
|                           | Middle 200             | 98.5 $\pm$ 3.7    | 96.1 $\pm$ 3      | 3.2             | 3.8       | 0.03 $\pm$ 0.0                                                          | 21.4   |
|                           | High 500               | 102.7 $\pm$ 0.9   | 102.5 $\pm$ 1.1   | 1.1             | 0.9       |                                                                         |        |
| C75                       | Low 50                 | 105 $\pm$ 1       | 103.3 $\pm$ 2.9   | 2.8             | 0.9       |                                                                         |        |
|                           | Middle 200             | 96.4 $\pm$ 4.4    | 96.6 $\pm$ 3.4    | 3.5             | 4.6       | 0.03 $\pm$ 0.0                                                          | 14.8   |
|                           | High 500               | 100.1 $\pm$ 2.5   | 101.7 $\pm$ 1.9   | 1.9             | 2.5       |                                                                         |        |
| C80                       | Low 50                 | 99.2 $\pm$ 1.5    | 99.8 $\pm$ 2.8    | 2.8             | 1.5       |                                                                         |        |
|                           | Middle 200             | 95 $\pm$ 5.2      | 96.6 $\pm$ 1.8    | 1.9             | 5.5       | 0.05 $\pm$ 0.0                                                          | 2.8    |
|                           | High 500               | 99.5 $\pm$ 3.2    | 101.7 $\pm$ 2     | 1.9             | 3.2       |                                                                         |        |
| C85                       | Low 50                 | 99.8 $\pm$ 3.4    | 98.9 $\pm$ 3.7    | 3.8             | 3.4       |                                                                         |        |
|                           | Middle 200             | 96.7 $\pm$ 5.9    | 97.3 $\pm$ 1.3    | 1.3             | 6.1       | 0.18 $\pm$ 0.0                                                          | 8.4    |
|                           | High 500               | 100.5 $\pm$ 0.6   | 102.2 $\pm$ 2.2   | 2.2             | 0.6       |                                                                         |        |
| C90                       | Low 50                 | 100.3 $\pm$ 3     | 99.3 $\pm$ 4.1    | 4.1             | 3.0       |                                                                         |        |
|                           | Middle 200             | 95.7 $\pm$ 4.4    | 97.4 $\pm$ 2.6    | 2.6             | 4.6       | 1.36 $\pm$ 0.2                                                          | 15.9   |
|                           | High 500               | 100.1 $\pm$ 1.7   | 104.9 $\pm$ 4.3   | 4.1             | 1.7       |                                                                         |        |
| C95                       | Low 50                 | 104.5 $\pm$ 11.7  | 105.1 $\pm$ 4.1   | 3.9             | 11.2      |                                                                         |        |
|                           | Middle 200             | 98.3 $\pm$ 4.4    | 101.2 $\pm$ 4     | 4.0             | 4.5       | 3.56 $\pm$ 0.6                                                          | 17.5   |
|                           | High 500               | 98 $\pm$ 0.5      | 106.7 $\pm$ 7.6   | 7.1             | 0.5       |                                                                         |        |
| C100                      | Low 50                 | 102.2 $\pm$ 11.4  | 101.6 $\pm$ 4.8   | 4.8             | 11.2      |                                                                         |        |
|                           | Middle 200             | 100.9 $\pm$ 4     | 103.5 $\pm$ 3.6   | 3.5             | 4.0       | 1.28 $\pm$ 0.3                                                          | 19.1   |
|                           | High 500               | 99.6 $\pm$ 0.6    | 109.1 $\pm$ 8.3   | 7.6             | 0.6       |                                                                         |        |
| C105                      | Low 50                 | 110.4 $\pm$ 5.5   | 108.0 $\pm$ 7.5   | 6.7             | 7.7       |                                                                         |        |
|                           | Middle 200             | 103.7 $\pm$ 3.6   | 106.2 $\pm$ 2.7   | 3.4             | 3.4       | 0.1 $\pm$ 0.0                                                           | 35.4   |
|                           | High 500               | 100.7 $\pm$ 1.9   | 110.3 $\pm$ 8.3   | 7.9             | 1.6       |                                                                         |        |

**Table S7.** Results from determination of extraction recovery (n=3) in blank solvent and post-preparation stability of RPLC-MS analysis of DoIP standard in HeLa cells extracts in autosampler for 20h (n=3).

| DoIP species<br>chain length | QC level<br>(pg/ $\mu$ L) | Extraction recovery (n=3) |        | Stability (n=3)   |        |
|------------------------------|---------------------------|---------------------------|--------|-------------------|--------|
|                              |                           | (Mean $\pm$ SD,%)         | (CV,%) | (Mean $\pm$ SD,%) | (CV,%) |
| C70                          | Low (50)                  | 95.5 $\pm$ 1.8            | 1.9    | 119.6 $\pm$ 0.8   | 0.7    |
|                              | High (500)                | 106.4 $\pm$ 2.6           | 2.4    | 119.3 $\pm$ 1.6   | 1.3    |
| C75                          | Low (50)                  | 103.6 $\pm$ 8.2           | 7.9    | 121.7 $\pm$ 1.4   | 1.2    |
|                              | High (500)                | 111.2 $\pm$ 4.5           | 4.1    | 118.5 $\pm$ 3.2   | 2.7    |
| C80                          | Low (50)                  | 103.9 $\pm$ 8.9           | 8.5    | 120.5 $\pm$ 0.1   | 0.1    |
|                              | High (500)                | 115.3 $\pm$ 4.5           | 3.9    | 118.8 $\pm$ 2.3   | 2      |
| C85                          | Low (50)                  | 112.2 $\pm$ 8.5           | 7.6    | 122.2 $\pm$ 1     | 0.8    |
|                              | High (500)                | 123.4 $\pm$ 6             | 4.8    | 124.9 $\pm$ 6.4   | 5.1    |
| C90                          | Low (50)                  | 118 $\pm$ 9.1             | 7.7    | 123.8 $\pm$ 2     | 1.6    |
|                              | High (500)                | 125.6 $\pm$ 5.9           | 4.7    | 118.9 $\pm$ 7.3   | 6.1    |
| C95                          | Low (50)                  | 123.3 $\pm$ 11.9          | 9.7    | 123.6 $\pm$ 3.2   | 2.6    |
|                              | High (500)                | 123.4 $\pm$ 6.2           | 5      | 113.8 $\pm$ 3.2   | 2.9    |
| C100                         | Low (50)                  | 134.6 $\pm$ 12.8          | 9.5    | 122.3 $\pm$ 4.1   | 3.4    |
|                              | High (500)                | 121.6 $\pm$ 8             | 6.6    | 100.1 $\pm$ 2     | 2      |
| C105                         | Low (50)                  | ND <sup>a</sup>           | 0      | 92.4 $\pm$ 15.9   | 17.2   |
|                              | High (500)                | 95.5 $\pm$ 1.8            | 1.9    | 99.9 $\pm$ 4.8    | 4.8    |

ND<sup>a</sup> = Not detected
